# Supplementary material for: Identification of the Molecular Subgroups in Idiopathic Pulmonary Fibrosis by Gene Expression Profiles
Source: Hindawi journal article supplement (doi:10.1155/2021/7922594), 2021-10-04
Supplement: f1 [file 7922594.f1.zip]

supplementary table 1

## common DEGs between datasets

| ID        | logFC        | P.Value  | adj.P.Value |
|-----------|--------------|----------|-------------|
| PLA2G7    | -1.315573148 | 3.67E-28 | 4.86E-25    |
| VCAN      | -1.029350431 | 3.90E-26 | 4.43E-23    |
| LRRN3     | 1.329869933  | 1.25E-24 | 1.02E-21    |
| SORL1     | -1.291277197 | 1.06E-22 | 4.67E-20    |
| GSN       | -1.41641199  | 1.38E-22 | 5.76E-20    |
| LHFPL2    | -1.077127017 | 1.51E-22 | 5.99E-20    |
| SPP1      | -1.537285066 | 7.53E-22 | 2.49E-19    |
| EMG1      | 1.127538641  | 2.37E-21 | 7.24E-19    |
| CTSK      | -1.218441005 | 3.11E-21 | 8.82E-19    |
| TMEM204   | 1.32962955   | 2.96E-20 | 4.50E-18    |
| TGFBI     | -1.007035175 | 3.07E-20 | 4.50E-18    |
| AQP9      | -1.086886818 | 3.12E-20 | 4.50E-18    |
| LITAF     | -1.064610128 | 5.82E-20 | 7.71E-18    |
| EMP1      | -1.028878517 | 6.44E-20 | 8.40E-18    |
| LYN       | -1.172407112 | 7.26E-20 | 9.16E-18    |
| ICAM3     | -1.140785803 | 1.57E-19 | 1.71E-17    |
| S100P     | -1.137900626 | 1.59E-19 | 1.71E-17    |
| ITGAX     | -1.125578779 | 2.91E-19 | 2.83E-17    |
| RPL23AP32 | 1.744771717  | 3.18E-19 | 3.01E-17    |
| CD97      | -1.098003672 | 3.38E-19 | 3.12E-17    |
| CXCR4     | -1.289602424 | 3.89E-19 | 3.47E-17    |
| PSAP      | -1.349222346 | 4.45E-19 | 3.93E-17    |
| FAM153A   | 1.419611385  | 6.39E-19 | 5.30E-17    |
| VASP      | -1.017590836 | 6.66E-19 | 5.36E-17    |
| VIM       | -1.447655894 | 9.69E-19 | 7.41E-17    |
| LIPA      | -1.105319304 | 1.10E-18 | 8.28E-17    |
| ARPC5     | -1.089586628 | 1.50E-18 | 1.06E-16    |
| SPRR1A    | -1.047003542 | 1.64E-18 | 1.14E-16    |
| TNFAIP2   | -1.470952433 | 2.47E-18 | 1.55E-16    |
| GCA       | -1.014023154 | 4.81E-18 | 2.86E-16    |
| SERPINA1  | -1.028395308 | 4.89E-18 | 2.88E-16    |
| ANKRD2    | 1.012826369  | 6.13E-18 | 3.51E-16    |
| KRTAP5-8  | 1.752801552  | 6.41E-18 | 3.61E-16    |
| SRGN      | -1.290442853 | 7.35E-18 | 4.00E-16    |
| POU3F3    | 1.217236126  | 7.39E-18 | 4.00E-16    |
| LY96      | -1.168648492 | 9.07E-18 | 4.81E-16    |
| GFAP      | 1.992893187  | 9.66E-18 | 5.09E-16    |
| IL1RN     | -1.329319776 | 1.09E-17 | 5.69E-16    |
| APOL3     | 1.090863446  | 1.26E-17 | 6.37E-16    |

|          |              |          |          |
|----------|--------------|----------|----------|
| GRN      | -1.626795095 | 1.36E-17 | 6.78E-16 |
| BDH2     | 1.017558497  | 2.19E-17 | 1.01E-15 |
| BAG3     | 1.04091118   | 2.65E-17 | 1.18E-15 |
| TCIRG1   | -1.291190335 | 2.87E-17 | 1.27E-15 |
| PRCP     | -1.227530174 | 2.98E-17 | 1.31E-15 |
| C1orf54  | -1.034179185 | 3.27E-17 | 1.41E-15 |
| BACH2    | 1.027744815  | 3.76E-17 | 1.59E-15 |
| MSX1     | 1.807385032  | 4.38E-17 | 1.82E-15 |
| LGALS1   | -1.087369629 | 4.51E-17 | 1.87E-15 |
| LGALS3   | -1.159101789 | 5.74E-17 | 2.27E-15 |
| MS4A1    | 1.682978358  | 5.91E-17 | 2.32E-15 |
| ATP6AP2  | -1.012028862 | 6.97E-17 | 2.65E-15 |
| PLBD1    | -1.472021814 | 7.25E-17 | 2.73E-15 |
| ZNF331   | 1.046786     | 7.42E-17 | 2.78E-15 |
| GDNF     | 1.522478254  | 1.35E-16 | 4.71E-15 |
| HEBP2    | -1.019647873 | 1.57E-16 | 5.33E-15 |
| KLRF1    | 1.416666294  | 2.00E-16 | 6.45E-15 |
| FBP1     | -1.46595606  | 2.06E-16 | 6.57E-15 |
| CTSA     | -1.228263432 | 2.56E-16 | 7.94E-15 |
| CD163    | -1.424969543 | 2.90E-16 | 8.95E-15 |
| PRX      | 2.062765089  | 4.48E-16 | 1.29E-14 |
| RAC2     | -1.28376923  | 4.67E-16 | 1.34E-14 |
| S100A11  | -1.120322877 | 4.69E-16 | 1.34E-14 |
| QSOX1    | -1.14244305  | 4.71E-16 | 1.34E-14 |
| MSN      | -1.163281527 | 6.45E-16 | 1.75E-14 |
| CAPG     | -1.489456669 | 6.89E-16 | 1.85E-14 |
| CD79B    | 1.238861922  | 7.49E-16 | 1.97E-14 |
| ABR      | -1.163276374 | 7.84E-16 | 2.06E-14 |
| PGD      | -1.130861315 | 8.13E-16 | 2.11E-14 |
| ACP5     | -1.015655048 | 8.77E-16 | 2.25E-14 |
| SOX17    | 1.182488862  | 9.46E-16 | 2.40E-14 |
| GLA      | -1.106197378 | 1.09E-15 | 2.68E-14 |
| TCF7     | 1.122005711  | 1.35E-15 | 3.20E-14 |
| CTSZ     | -1.042355244 | 1.71E-15 | 3.88E-14 |
| CTSW     | 1.198695545  | 1.91E-15 | 4.27E-14 |
| EMILIN2  | -1.304554674 | 2.28E-15 | 5.01E-14 |
| CTSD     | -1.204736737 | 2.37E-15 | 5.13E-14 |
| C19orf53 | 1.042972848  | 2.47E-15 | 5.30E-14 |
| MST1     | 1.516978107  | 2.50E-15 | 5.36E-14 |
| GPT      | 1.283433865  | 2.58E-15 | 5.51E-14 |
| HIST1H3C | -1.042022874 | 2.69E-15 | 5.71E-14 |
| ARHGDIB  | -1.079445365 | 2.69E-15 | 5.71E-14 |
| MRPL40   | 1.051268902  | 2.91E-15 | 6.11E-14 |
| H3F3A    | -1.331207858 | 3.21E-15 | 6.68E-14 |

|         |              |          |          |
|---------|--------------|----------|----------|
| CLDN5   | 1.212369623  | 3.25E-15 | 6.74E-14 |
| ZFP36   | -1.101592639 | 3.25E-15 | 6.74E-14 |
| MS4A4A  | -1.127037041 | 3.26E-15 | 6.74E-14 |
| HPGD    | 1.02982117   | 3.35E-15 | 6.89E-14 |
| DAZAP2  | -1.087889182 | 3.63E-15 | 7.40E-14 |
| ALOX5   | -1.138123168 | 3.66E-15 | 7.43E-14 |
| MTG1    | 1.02657113   | 3.94E-15 | 7.88E-14 |
| KLHDC2  | 1.202425055  | 4.24E-15 | 8.35E-14 |
| CLIC3   | 1.050489227  | 4.28E-15 | 8.39E-14 |
| ATP6V0C | -1.121850526 | 4.96E-15 | 9.58E-14 |
| S1PR1   | 1.020339134  | 5.17E-15 | 9.91E-14 |
| ZNF862  | 1.029632507  | 5.25E-15 | 1.00E-13 |
| LCP1    | -1.109184541 | 5.40E-15 | 1.02E-13 |
| STAT6   | -1.099828989 | 5.69E-15 | 1.07E-13 |
| COTL1   | -1.131504642 | 6.49E-15 | 1.20E-13 |
| KRT81   | -1.324459254 | 7.40E-15 | 1.35E-13 |
| ATP5S   | 1.050095248  | 7.56E-15 | 1.36E-13 |
| HPCA    | 1.500170153  | 8.01E-15 | 1.42E-13 |
| MARCO   | -1.823469581 | 8.55E-15 | 1.50E-13 |
| FCGR1B  | -1.20788177  | 8.74E-15 | 1.53E-13 |
| CXCR5   | 1.42299781   | 9.15E-15 | 1.59E-13 |
| VASH1   | -1.070840096 | 9.53E-15 | 1.64E-13 |
| NPC2    | -1.397217546 | 9.66E-15 | 1.66E-13 |
| TYMP    | -1.323082543 | 1.04E-14 | 1.77E-13 |
| SNX2    | -1.005781549 | 1.16E-14 | 1.93E-13 |
| ALG13   | 1.036582009  | 1.20E-14 | 1.99E-13 |
| APOE    | -1.099850089 | 1.24E-14 | 2.04E-13 |
| PTCD2   | 1.208604816  | 1.25E-14 | 2.05E-13 |
| RIC3    | 1.635624724  | 1.28E-14 | 2.09E-13 |
| ZNF492  | 1.304962827  | 1.33E-14 | 2.17E-13 |
| SGK1    | -1.036935653 | 1.44E-14 | 2.31E-13 |
| ACTB    | -1.529716317 | 1.59E-14 | 2.48E-13 |
| HSP90B1 | -1.266439161 | 1.59E-14 | 2.48E-13 |
| USP53   | 1.27029594   | 1.69E-14 | 2.62E-13 |
| CSF1R   | -1.428627746 | 1.73E-14 | 2.67E-13 |
| S100A8  | -1.2802341   | 1.76E-14 | 2.70E-13 |
| CEBPB   | -1.0838711   | 2.05E-14 | 3.06E-13 |
| TUBB6   | -1.032305977 | 2.17E-14 | 3.22E-13 |
| CHRNA2  | 1.538903834  | 2.31E-14 | 3.39E-13 |
| FCER1G  | -1.113945273 | 2.44E-14 | 3.53E-13 |
| NDUFA4  | 1.117677228  | 2.66E-14 | 3.82E-13 |
| CNR1    | 1.127023883  | 2.87E-14 | 4.03E-13 |
| PHACTR4 | 1.27805266   | 2.89E-14 | 4.05E-13 |
| CACNB1  | 1.222657184  | 2.90E-14 | 4.05E-13 |

|          |              |          |          |
|----------|--------------|----------|----------|
| SH3BGRL3 | -1.405086584 | 3.06E-14 | 4.26E-13 |
| NKX3-1   | 1.247353443  | 3.15E-14 | 4.37E-13 |
| PCDH9    | 1.095819972  | 3.16E-14 | 4.37E-13 |
| LMNA     | -1.205867342 | 3.32E-14 | 4.57E-13 |
| IRX5     | 1.760770537  | 3.37E-14 | 4.62E-13 |
| SMA4     | 1.288749148  | 3.57E-14 | 4.86E-13 |
| ABHD10   | 1.541070289  | 4.04E-14 | 5.35E-13 |
| CNTNAP2  | 2.182837233  | 4.17E-14 | 5.48E-13 |
| HLA-B    | -1.116862312 | 4.28E-14 | 5.61E-13 |
| S100A10  | -1.30061098  | 4.47E-14 | 5.81E-13 |
| TSPYL2   | 1.037695804  | 4.52E-14 | 5.85E-13 |
| CEBPD    | -1.056183437 | 4.56E-14 | 5.89E-13 |
| FRMD4A   | 1.171014196  | 4.66E-14 | 6.02E-13 |
| S100A4   | -1.090224779 | 5.08E-14 | 6.49E-13 |
| CYP2W1   | -1.157420578 | 5.24E-14 | 6.67E-13 |
| AIF1     | -1.480308092 | 5.79E-14 | 7.25E-13 |
| CDC42    | -1.16057164  | 6.40E-14 | 7.91E-13 |
| SNX3     | -1.10584827  | 6.42E-14 | 7.92E-13 |
| ATP6AP1  | -1.152938163 | 6.62E-14 | 8.13E-13 |
| GMFG     | -1.205760432 | 6.83E-14 | 8.36E-13 |
| RNF144A  | 1.354243491  | 7.20E-14 | 8.74E-13 |
| HCLS1    | -1.374381577 | 7.32E-14 | 8.86E-13 |
| SPTBN1   | 1.200214759  | 7.36E-14 | 8.90E-13 |
| ACADVL   | -1.103919457 | 8.09E-14 | 9.66E-13 |
| CHMP2A   | -1.120500958 | 8.16E-14 | 9.71E-13 |
| HMOX1    | -1.015942027 | 8.61E-14 | 1.02E-12 |
| TCL1B    | 1.027362682  | 8.70E-14 | 1.02E-12 |
| HSP90AA1 | -1.062069964 | 8.77E-14 | 1.03E-12 |
| KLRB1    | 1.008485876  | 8.85E-14 | 1.04E-12 |
| DCAF4    | 1.006728607  | 1.06E-13 | 1.22E-12 |
| IFIT1    | -1.065116506 | 1.17E-13 | 1.33E-12 |
| DGKE     | 1.309014003  | 1.20E-13 | 1.35E-12 |
| ZNF91    | 1.100938798  | 1.40E-13 | 1.54E-12 |
| ISG15    | -1.383394406 | 1.40E-13 | 1.54E-12 |
| PPT1     | -1.244723046 | 1.43E-13 | 1.56E-12 |
| BBS1     | 1.591094111  | 1.43E-13 | 1.56E-12 |
| IPO9     | 1.12917642   | 1.52E-13 | 1.65E-12 |
| CACNA1E  | 2.100794162  | 1.57E-13 | 1.69E-12 |
| ZNF24    | 1.037999711  | 1.57E-13 | 1.69E-12 |
| MOGS     | -1.035880566 | 1.61E-13 | 1.73E-12 |
| UTRN     | 1.007780687  | 1.64E-13 | 1.76E-12 |
| SOX18    | 1.103763317  | 1.82E-13 | 1.93E-12 |
| OVGP1    | 1.212920592  | 1.84E-13 | 1.95E-12 |
| TREM1    | -1.204285995 | 1.84E-13 | 1.95E-12 |

|          |              |          |          |
|----------|--------------|----------|----------|
| CD14     | -1.215897328 | 1.86E-13 | 1.96E-12 |
| S100A6   | -1.613944441 | 1.92E-13 | 2.02E-12 |
| TOE1     | 1.128435332  | 1.95E-13 | 2.04E-12 |
| PUS7L    | 2.07818082   | 1.97E-13 | 2.06E-12 |
| EIF1     | -1.425766733 | 2.12E-13 | 2.18E-12 |
| VCP      | -1.184433098 | 2.12E-13 | 2.18E-12 |
| FGR      | -1.099912614 | 2.17E-13 | 2.22E-12 |
| FAM111A  | 1.133000214  | 2.27E-13 | 2.32E-12 |
| C1QB     | -1.311167766 | 2.30E-13 | 2.34E-12 |
| SFXN1    | 1.596447777  | 2.37E-13 | 2.41E-12 |
| TUBB2A   | -1.014121955 | 2.49E-13 | 2.52E-12 |
| SLA      | -1.144694729 | 2.51E-13 | 2.53E-12 |
| BDH1     | 1.163132373  | 2.51E-13 | 2.53E-12 |
| SCAI     | 1.265356467  | 2.53E-13 | 2.54E-12 |
| ADRA1D   | 1.3398716    | 2.67E-13 | 2.66E-12 |
| MRPS27   | 1.201680339  | 2.70E-13 | 2.69E-12 |
| LY9      | 1.143303052  | 2.74E-13 | 2.71E-12 |
| PIP5K1B  | 1.128956298  | 2.85E-13 | 2.78E-12 |
| BAG1     | -1.071775677 | 3.24E-13 | 3.10E-12 |
| LMF1     | 1.440664037  | 3.38E-13 | 3.23E-12 |
| CRIP1    | -1.118693571 | 3.40E-13 | 3.24E-12 |
| C1orf21  | 1.284167591  | 3.41E-13 | 3.24E-12 |
| MYCN     | 1.168539927  | 3.46E-13 | 3.28E-12 |
| FOXE1    | 1.486895162  | 3.50E-13 | 3.32E-12 |
| ZNF358   | 1.255763649  | 3.75E-13 | 3.53E-12 |
| CYB5R3   | -1.23626288  | 3.82E-13 | 3.59E-12 |
| OFD1     | 1.003150775  | 3.94E-13 | 3.69E-12 |
| GAS2     | 1.080305426  | 3.98E-13 | 3.72E-12 |
| ALDH2    | -1.211641681 | 4.00E-13 | 3.73E-12 |
| GAA      | -1.158790467 | 4.12E-13 | 3.81E-12 |
| ASF1A    | 1.570991991  | 4.27E-13 | 3.95E-12 |
| GATAD1   | 1.060099147  | 4.30E-13 | 3.97E-12 |
| SIDT2    | -1.19525066  | 4.34E-13 | 3.99E-12 |
| ATP1B3   | -1.121609062 | 4.34E-13 | 4.00E-12 |
| GPR12    | 1.31747408   | 4.38E-13 | 4.02E-12 |
| TMEM59   | -1.009168863 | 4.41E-13 | 4.04E-12 |
| TMEM97   | 1.185459229  | 4.45E-13 | 4.07E-12 |
| TAF1D    | 1.253557669  | 4.51E-13 | 4.11E-12 |
| PSMB10   | -1.075011232 | 4.78E-13 | 4.33E-12 |
| TSPO     | -1.308569466 | 4.93E-13 | 4.45E-12 |
| KRTAP5-9 | 1.161521678  | 4.94E-13 | 4.45E-12 |
| MMP15    | 1.21025419   | 5.18E-13 | 4.63E-12 |
| SOCS7    | 1.483447422  | 5.35E-13 | 4.77E-12 |
| IRX4     | 1.161445121  | 5.42E-13 | 4.81E-12 |

|          |              |          |          |
|----------|--------------|----------|----------|
| STAT3    | 1.043310857  | 5.56E-13 | 4.92E-12 |
| B2M      | -1.073511957 | 5.65E-13 | 4.97E-12 |
| PAIP2B   | 1.018487586  | 6.38E-13 | 5.51E-12 |
| GPR20    | 1.146229943  | 6.48E-13 | 5.56E-12 |
| PDZD7    | 1.082905334  | 6.61E-13 | 5.62E-12 |
| VPRBP    | 1.231514035  | 6.65E-13 | 5.65E-12 |
| GPR37    | 1.493207579  | 6.69E-13 | 5.68E-12 |
| WVOX     | 1.228758828  | 6.78E-13 | 5.75E-12 |
| PALM     | 1.275023079  | 6.82E-13 | 5.75E-12 |
| PECAM1   | -1.02976642  | 7.09E-13 | 5.91E-12 |
| KRIT1    | 1.633881587  | 7.40E-13 | 6.11E-12 |
| GPX7     | 1.149617755  | 7.41E-13 | 6.11E-12 |
| KIR2DL2  | 1.110972091  | 7.47E-13 | 6.15E-12 |
| C21orf91 | 1.247546824  | 8.14E-13 | 6.62E-12 |
| GOLGA8A  | 1.319470268  | 8.39E-13 | 6.80E-12 |
| PYHIN1   | 1.326566424  | 8.62E-13 | 6.92E-12 |
| DUSP2    | 1.222713101  | 8.70E-13 | 6.95E-12 |
| GPX1     | -1.208309284 | 8.80E-13 | 7.03E-12 |
| FUT5     | 1.258531369  | 8.83E-13 | 7.04E-12 |
| PASK     | 1.035591138  | 9.27E-13 | 7.34E-12 |
| GPR126   | 1.388774575  | 9.83E-13 | 7.77E-12 |
| CAMLG    | 1.7122011    | 9.98E-13 | 7.83E-12 |
| ZNF506   | 1.525324655  | 1.01E-12 | 7.90E-12 |
| VPS39    | 1.11362518   | 1.03E-12 | 8.05E-12 |
| ZNF43    | 1.0060611    | 1.08E-12 | 8.34E-12 |
| NELL2    | 1.023391813  | 1.08E-12 | 8.35E-12 |
| CRTAP    | 1.395952274  | 1.08E-12 | 8.37E-12 |
| RAP1B    | -1.062182653 | 1.15E-12 | 8.77E-12 |
| TMEM194A | 1.010873567  | 1.17E-12 | 8.92E-12 |
| GZMA     | 1.250968588  | 1.21E-12 | 9.16E-12 |
| UBB      | -1.494849146 | 1.23E-12 | 9.33E-12 |
| ATP1B1   | -1.07124619  | 1.26E-12 | 9.49E-12 |
| OAZ1     | -1.52085958  | 1.30E-12 | 9.75E-12 |
| ARPC2    | -1.309933611 | 1.31E-12 | 9.81E-12 |
| TKT      | -1.354749091 | 1.31E-12 | 9.83E-12 |
| UBOX5    | 1.038999907  | 1.32E-12 | 9.89E-12 |
| LAMP1    | -1.207944545 | 1.34E-12 | 9.99E-12 |
| DNPEP    | 1.052681345  | 1.35E-12 | 1.01E-11 |
| ULK4     | 1.118203659  | 1.36E-12 | 1.01E-11 |
| CNPY4    | 1.483890832  | 1.37E-12 | 1.02E-11 |
| GNAI2    | -1.325769876 | 1.39E-12 | 1.03E-11 |
| FHIT     | 1.066254037  | 1.40E-12 | 1.04E-11 |
| QRSL1    | 1.313009199  | 1.41E-12 | 1.04E-11 |
| ATP5E    | -1.457774717 | 1.42E-12 | 1.05E-11 |

|           |              |          |          |
|-----------|--------------|----------|----------|
| MAPKAPK5  | 1.063995019  | 1.44E-12 | 1.06E-11 |
| NPR2      | 1.16955401   | 1.45E-12 | 1.06E-11 |
| POMT2     | 1.011787178  | 1.47E-12 | 1.08E-11 |
| ATP8B2    | 1.19095219   | 1.47E-12 | 1.08E-11 |
| N4BP3     | 1.999899862  | 1.49E-12 | 1.09E-11 |
| ANXA1     | -1.203821033 | 1.49E-12 | 1.09E-11 |
| ZNF507    | 1.014814481  | 1.50E-12 | 1.09E-11 |
| INTS6     | 1.11673532   | 1.53E-12 | 1.11E-11 |
| EFNB3     | 1.332840222  | 1.60E-12 | 1.15E-11 |
| ARG1      | 1.282341879  | 1.61E-12 | 1.16E-11 |
| KRR1      | 1.672196535  | 1.68E-12 | 1.20E-11 |
| TCF7L2    | 1.066610491  | 1.69E-12 | 1.21E-11 |
| GNG5      | -1.001269992 | 1.75E-12 | 1.24E-11 |
| BCR       | 1.060148354  | 1.80E-12 | 1.27E-11 |
| ANXA2     | -1.21536265  | 1.81E-12 | 1.27E-11 |
| TBC1D19   | 1.014830949  | 1.81E-12 | 1.27E-11 |
| ACVR2B    | 1.331761077  | 1.86E-12 | 1.30E-11 |
| GAMT      | 1.544761027  | 1.88E-12 | 1.31E-11 |
| LGR4      | 1.622363547  | 2.02E-12 | 1.40E-11 |
| FLJ11710  | 1.019278118  | 2.03E-12 | 1.40E-11 |
| MAB21L2   | 1.263481317  | 2.13E-12 | 1.46E-11 |
| ZNF510    | 1.307549136  | 2.17E-12 | 1.49E-11 |
| RETN      | -1.13155778  | 2.32E-12 | 1.58E-11 |
| FEM1C     | 1.073150317  | 2.49E-12 | 1.69E-11 |
| CA4       | 1.133660654  | 2.63E-12 | 1.76E-11 |
| KCNK7     | 1.630949213  | 2.68E-12 | 1.80E-11 |
| E2F5      | 1.09817324   | 2.78E-12 | 1.85E-11 |
| OSGEPL1   | 1.170014517  | 2.81E-12 | 1.87E-11 |
| ZNF609    | 1.025202616  | 3.02E-12 | 1.98E-11 |
| COX6B1    | -1.038994676 | 3.03E-12 | 1.98E-11 |
| LOC202181 | 1.508011291  | 3.06E-12 | 2.00E-11 |
| FAM168A   | 1.166972648  | 3.07E-12 | 2.01E-11 |
| INPP4B    | 1.026996966  | 3.09E-12 | 2.02E-11 |
| RAD9A     | 1.389293478  | 3.12E-12 | 2.04E-11 |
| HBS1L     | 1.1264736    | 3.24E-12 | 2.10E-11 |
| OGDH      | 1.525852682  | 3.25E-12 | 2.11E-11 |
| ARHGAP24  | 1.426664556  | 3.26E-12 | 2.11E-11 |
| TRIM66    | 1.129827282  | 3.29E-12 | 2.12E-11 |
| NBPF1     | 1.459869104  | 3.31E-12 | 2.14E-11 |
| FLJ10038  | 1.04591295   | 3.33E-12 | 2.15E-11 |
| ZNF430    | 1.352110381  | 3.35E-12 | 2.16E-11 |
| PLA2G15   | -1.251476721 | 3.39E-12 | 2.18E-11 |
| MBTPS2    | 1.07347919   | 3.40E-12 | 2.18E-11 |
| INADL     | 1.027082622  | 3.43E-12 | 2.19E-11 |

|          |              |          |          |
|----------|--------------|----------|----------|
| CLIC1    | -1.150388597 | 3.55E-12 | 2.26E-11 |
| CTRL     | 1.768029171  | 3.64E-12 | 2.31E-11 |
| TMEM176B | -1.02396212  | 3.80E-12 | 2.40E-11 |
| TNIK     | 1.034445565  | 3.82E-12 | 2.40E-11 |
| DTX3     | 1.52198758   | 3.86E-12 | 2.42E-11 |
| SEPT9    | -1.234095294 | 3.91E-12 | 2.45E-11 |
| ZAP70    | 1.511476039  | 3.97E-12 | 2.48E-11 |
| PNPLA4   | 1.216806351  | 4.05E-12 | 2.53E-11 |
| JAM3     | 1.323285165  | 4.12E-12 | 2.57E-11 |
| GEMIN8   | 1.285726321  | 4.21E-12 | 2.62E-11 |
| TCEB3    | 1.053651193  | 4.24E-12 | 2.63E-11 |
| TRIB2    | 1.12481275   | 4.32E-12 | 2.68E-11 |
| MALT1    | 1.522290851  | 4.36E-12 | 2.69E-11 |
| ZNF665   | 1.058970618  | 4.55E-12 | 2.79E-11 |
| RNF41    | 1.042308291  | 4.60E-12 | 2.82E-11 |
| SCN3B    | 1.197729323  | 4.66E-12 | 2.85E-11 |
| TUBA1B   | -1.294670221 | 4.80E-12 | 2.93E-11 |
| RGS10    | -1.075703276 | 4.82E-12 | 2.94E-11 |
| PTMA     | -1.191675039 | 4.95E-12 | 3.00E-11 |
| ADAMTS5  | 1.693260349  | 5.15E-12 | 3.11E-11 |
| PFKM     | 1.013172029  | 5.16E-12 | 3.12E-11 |
| RUFY3    | 1.396683545  | 5.22E-12 | 3.14E-11 |
| PPP2CA   | 1.177096198  | 5.30E-12 | 3.19E-11 |
| CR2      | 1.113098122  | 5.54E-12 | 3.31E-11 |
| DDX50    | 1.168825172  | 5.56E-12 | 3.31E-11 |
| CCT5     | 1.280126881  | 5.71E-12 | 3.40E-11 |
| SEMA3B   | 1.035753898  | 5.72E-12 | 3.40E-11 |
| GH2      | 1.416245355  | 5.83E-12 | 3.45E-11 |
| IFT52    | 1.090409103  | 5.90E-12 | 3.49E-11 |
| ANGPT1   | 1.050721444  | 6.10E-12 | 3.59E-11 |
| ADCY9    | 1.247724956  | 6.12E-12 | 3.59E-11 |
| PPP1R2   | 1.004484699  | 6.13E-12 | 3.60E-11 |
| DLD      | 1.36937459   | 6.83E-12 | 3.96E-11 |
| ST8SIA2  | 1.452553805  | 6.89E-12 | 3.99E-11 |
| SLC7A6   | 1.439234671  | 6.96E-12 | 4.03E-11 |
| COX8A    | -1.189634099 | 7.12E-12 | 4.11E-11 |
| TTC9     | 1.37346421   | 7.20E-12 | 4.15E-11 |
| METAP1   | 1.019814073  | 7.32E-12 | 4.21E-11 |
| CCDC9    | -1.274844936 | 7.34E-12 | 4.22E-11 |
| OGFR     | -1.206393362 | 7.42E-12 | 4.27E-11 |
| KIR2DS4  | 1.386055785  | 7.52E-12 | 4.31E-11 |
| ZNF132   | 1.366061076  | 7.70E-12 | 4.40E-11 |
| CLDN11   | 1.342086364  | 7.94E-12 | 4.51E-11 |
| NT5E     | 1.541944973  | 8.03E-12 | 4.55E-11 |



|          |              |          |          |
|----------|--------------|----------|----------|
| SAMD9    | 1.445110918  | 8.07E-12 | 4.57E-11 |
| NDRG3    | 1.219612114  | 8.10E-12 | 4.58E-11 |
| ERCC2    | 1.199085084  | 8.19E-12 | 4.63E-11 |
| HLTF     | 1.069932705  | 8.71E-12 | 4.89E-11 |
| AVIL     | 1.217218532  | 8.87E-12 | 4.97E-11 |
| NFATC4   | 1.234138961  | 9.27E-12 | 5.17E-11 |
| BCAS4    | 1.288363186  | 9.48E-12 | 5.28E-11 |
| LEF1     | 1.42726147   | 9.55E-12 | 5.31E-11 |
| EPM2A    | 1.105373224  | 9.56E-12 | 5.31E-11 |
| DYNC1LI2 | 1.025722708  | 9.58E-12 | 5.31E-11 |
| CASP8    | 1.14050648   | 9.62E-12 | 5.32E-11 |
| MSH3     | 1.297073151  | 9.64E-12 | 5.33E-11 |
| HLA-DPB1 | -1.483929605 | 9.92E-12 | 5.47E-11 |
| OTUD3    | 1.115870423  | 9.92E-12 | 5.47E-11 |
| FOXRED2  | 1.41606751   | 1.07E-11 | 5.86E-11 |
| SLC17A4  | 1.630386301  | 1.08E-11 | 5.88E-11 |
| PLG      | 1.00288733   | 1.12E-11 | 6.07E-11 |
| MRS2     | 1.322538025  | 1.15E-11 | 6.19E-11 |
| ZNHIT6   | 1.20796139   | 1.16E-11 | 6.25E-11 |
| IFT57    | 1.49046074   | 1.17E-11 | 6.32E-11 |
| ZNF79    | 1.152071757  | 1.17E-11 | 6.32E-11 |
| VAV2     | 1.143265678  | 1.19E-11 | 6.38E-11 |
| HHLA3    | 1.419757618  | 1.19E-11 | 6.39E-11 |
| IL18R1   | 1.438284565  | 1.19E-11 | 6.39E-11 |
| ARHGEF12 | 1.733636548  | 1.21E-11 | 6.45E-11 |
| RALGPS2  | 1.711672303  | 1.23E-11 | 6.55E-11 |
| NR4A1    | 1.112284052  | 1.27E-11 | 6.73E-11 |
| CPN2     | 1.877607994  | 1.27E-11 | 6.74E-11 |
| ELF5     | 1.435660335  | 1.28E-11 | 6.76E-11 |
| MLEC     | 1.060220223  | 1.29E-11 | 6.83E-11 |
| HNF1B    | 1.237978911  | 1.29E-11 | 6.83E-11 |
| ZNF140   | 1.181487208  | 1.31E-11 | 6.90E-11 |
| SLC4A5   | 1.347039366  | 1.33E-11 | 6.98E-11 |
| ABCC4    | 1.521094057  | 1.33E-11 | 6.99E-11 |
| LIMD2    | 1.29331572   | 1.34E-11 | 7.03E-11 |
| SUPT3H   | 1.019195171  | 1.34E-11 | 7.04E-11 |
| PRKRIR   | 1.222938693  | 1.36E-11 | 7.10E-11 |
| DHDDS    | 1.073323736  | 1.41E-11 | 7.37E-11 |
| RASL12   | 1.474714343  | 1.41E-11 | 7.38E-11 |
| TBC1D8   | 1.227209732  | 1.44E-11 | 7.49E-11 |
| KIF1A    | 1.248468617  | 1.46E-11 | 7.59E-11 |
| POLH     | 1.200105447  | 1.54E-11 | 7.94E-11 |
| CYP27A1  | -1.093790052 | 1.60E-11 | 8.18E-11 |
| SULT1B1  | 1.402825164  | 1.62E-11 | 8.26E-11 |

|              |              |          |          |
|--------------|--------------|----------|----------|
| ZNF473       | 1.255334192  | 1.63E-11 | 8.29E-11 |
| FRS3         | 1.168385603  | 1.64E-11 | 8.34E-11 |
| VPREB1       | 1.871728489  | 1.70E-11 | 8.62E-11 |
| NPBWR2       | 1.156773653  | 1.71E-11 | 8.63E-11 |
| ENDOD1       | 1.185303195  | 1.72E-11 | 8.67E-11 |
| SYCE1L       | 1.432368307  | 1.73E-11 | 8.71E-11 |
| WDR46        | 1.000391662  | 1.75E-11 | 8.82E-11 |
| RPS27L       | -1.047890108 | 1.78E-11 | 8.92E-11 |
| MFGE8        | 1.256138236  | 1.80E-11 | 9.02E-11 |
| TIGD6        | 1.389083315  | 1.84E-11 | 9.19E-11 |
| SNIP1        | 1.160648683  | 1.85E-11 | 9.21E-11 |
| CA5A         | 1.360281215  | 1.86E-11 | 9.25E-11 |
| FGF9         | 1.035048467  | 1.87E-11 | 9.31E-11 |
| EPM2AIP1     | 1.261879294  | 1.90E-11 | 9.44E-11 |
| ENO2         | 1.486298034  | 1.94E-11 | 9.60E-11 |
| SAMD14       | 1.652107222  | 1.96E-11 | 9.66E-11 |
| ZNF706       | 1.002950595  | 2.07E-11 | 1.01E-10 |
| USP7         | 1.101453077  | 2.16E-11 | 1.05E-10 |
| EHBP1        | 1.032446915  | 2.17E-11 | 1.05E-10 |
| C10orf2      | 1.23387997   | 2.17E-11 | 1.05E-10 |
| PPP2R5A      | 1.199656145  | 2.18E-11 | 1.06E-10 |
| GIN1         | 1.056447795  | 2.20E-11 | 1.07E-10 |
| PPBP         | -1.123233756 | 2.24E-11 | 1.08E-10 |
| SMURF2       | 1.604525776  | 2.31E-11 | 1.11E-10 |
| CHGA         | 1.352596063  | 2.48E-11 | 1.18E-10 |
| FUT2         | 1.373378939  | 2.54E-11 | 1.20E-10 |
| SHC3         | 1.281384945  | 2.55E-11 | 1.20E-10 |
| RGS6         | 1.284592309  | 2.61E-11 | 1.23E-10 |
| KIAA0485     | 1.252308514  | 2.62E-11 | 1.23E-10 |
| HEXIM1       | 1.024745003  | 2.62E-11 | 1.23E-10 |
| ERI3         | 1.135056117  | 2.63E-11 | 1.23E-10 |
| ZNF468       | 1.164195648  | 2.71E-11 | 1.26E-10 |
| DTNB         | 1.210346987  | 2.82E-11 | 1.31E-10 |
| AXIN1        | 1.284963251  | 2.82E-11 | 1.31E-10 |
| LOC100130331 | 1.376568727  | 2.85E-11 | 1.32E-10 |
| EFHC1        | 1.000735951  | 2.87E-11 | 1.33E-10 |
| GHRHR        | 1.55170407   | 2.88E-11 | 1.33E-10 |
| ZC3H13       | 1.489570897  | 2.88E-11 | 1.33E-10 |
| C16orf3      | 1.353568415  | 2.94E-11 | 1.35E-10 |
| RPS24        | -1.162938702 | 2.94E-11 | 1.35E-10 |
| PLCL1        | 1.534442733  | 3.06E-11 | 1.40E-10 |
| TOB2         | 1.174172906  | 3.09E-11 | 1.41E-10 |
| PLCH2        | 1.17357369   | 3.17E-11 | 1.44E-10 |
| HEMK1        | 1.37488988   | 3.26E-11 | 1.47E-10 |

|          |              |          |          |
|----------|--------------|----------|----------|
| TM2D3    | 1.007500698  | 3.29E-11 | 1.49E-10 |
| CYP2E1   | 1.202611687  | 3.40E-11 | 1.53E-10 |
| TMEM8B   | 1.079457859  | 3.44E-11 | 1.55E-10 |
| KCNIP2   | 1.345622747  | 3.54E-11 | 1.58E-10 |
| HSPB1    | -1.06342593  | 3.56E-11 | 1.59E-10 |
| RPLP2    | -1.449368866 | 3.56E-11 | 1.59E-10 |
| HLA-DMA  | -1.114177208 | 3.58E-11 | 1.60E-10 |
| SCNN1B   | 1.501996847  | 3.67E-11 | 1.64E-10 |
| RPS6KB1  | 1.115521079  | 3.71E-11 | 1.65E-10 |
| KIRREL   | 1.073071725  | 3.76E-11 | 1.67E-10 |
| HTR3A    | 1.433260458  | 3.81E-11 | 1.68E-10 |
| SEC61A2  | 1.40626658   | 3.82E-11 | 1.68E-10 |
| TJP1     | 1.191418344  | 3.83E-11 | 1.69E-10 |
| DLX2     | 1.23989381   | 3.87E-11 | 1.70E-10 |
| CAPRIN1  | 1.074414014  | 3.87E-11 | 1.70E-10 |
| AGBL5    | 1.381136019  | 3.98E-11 | 1.75E-10 |
| GRAMD1B  | 1.241914387  | 3.99E-11 | 1.75E-10 |
| MYCT1    | 1.376460571  | 4.02E-11 | 1.76E-10 |
| COX15    | 1.472555941  | 4.04E-11 | 1.77E-10 |
| PF4V1    | 1.481693244  | 4.05E-11 | 1.77E-10 |
| BIRC2    | 1.085513386  | 4.08E-11 | 1.78E-10 |
| MAP4     | -1.243758318 | 4.08E-11 | 1.78E-10 |
| TXNIP    | -1.032876772 | 4.13E-11 | 1.80E-10 |
| SOX21    | 1.498292093  | 4.15E-11 | 1.81E-10 |
| HIST3H2A | 1.466885318  | 4.17E-11 | 1.81E-10 |
| UBASH3A  | 1.208101218  | 4.20E-11 | 1.82E-10 |
| ARMCX3   | 1.13650306   | 4.34E-11 | 1.88E-10 |
| ADAMTS7  | -1.195959573 | 4.48E-11 | 1.92E-10 |
| XPO4     | 1.132923467  | 4.57E-11 | 1.96E-10 |
| ESPN     | 1.31383044   | 4.65E-11 | 1.99E-10 |
| PRDM11   | 1.001437256  | 4.66E-11 | 1.99E-10 |
| EML3     | 1.028757191  | 4.72E-11 | 2.01E-10 |
| FAM69A   | 1.20620017   | 4.72E-11 | 2.01E-10 |
| LY6G5C   | 1.040763041  | 4.83E-11 | 2.06E-10 |
| CSNK1A1  | 1.119673744  | 4.86E-11 | 2.07E-10 |
| EPPK1    | 1.352449992  | 5.02E-11 | 2.13E-10 |
| C6orf120 | 1.072779205  | 5.11E-11 | 2.16E-10 |
| UBE2O    | 1.141231734  | 5.15E-11 | 2.17E-10 |
| CASKIN2  | 1.017643899  | 5.27E-11 | 2.22E-10 |
| CAMTA1   | 1.334803918  | 5.34E-11 | 2.24E-10 |
| AP4M1    | 1.269433053  | 5.41E-11 | 2.27E-10 |
| FBXO17   | 1.047454819  | 5.43E-11 | 2.27E-10 |
| TPR      | 1.029306902  | 5.87E-11 | 2.43E-10 |
| KIR3DL1  | 1.372738028  | 5.90E-11 | 2.44E-10 |

|         |              |          |          |
|---------|--------------|----------|----------|
| STRADA  | 1.043162645  | 5.90E-11 | 2.44E-10 |
| CYP3A5  | 1.045285677  | 6.19E-11 | 2.54E-10 |
| MTHFSD  | 1.030479407  | 6.55E-11 | 2.68E-10 |
| RBM15B  | 1.105689368  | 6.56E-11 | 2.68E-10 |
| ZNF222  | 1.078577057  | 6.58E-11 | 2.69E-10 |
| SMC5    | 1.222730633  | 6.64E-11 | 2.71E-10 |
| XPNPEP2 | 1.136276975  | 7.00E-11 | 2.82E-10 |
| GM2A    | -1.186619557 | 7.26E-11 | 2.91E-10 |
| STK17A  | 1.027028962  | 7.53E-11 | 3.01E-10 |
| EID1    | 1.04716086   | 7.54E-11 | 3.01E-10 |
| FAM172A | 1.148440798  | 7.56E-11 | 3.02E-10 |
| ANKFY1  | 1.426515409  | 7.66E-11 | 3.06E-10 |
| INPP1   | 1.13071146   | 7.71E-11 | 3.07E-10 |
| MICAL3  | 1.281125973  | 7.71E-11 | 3.07E-10 |
| MASP2   | 1.211813259  | 7.90E-11 | 3.14E-10 |
| DRD2    | 1.119830446  | 7.92E-11 | 3.14E-10 |
| IL21R   | 1.163171752  | 7.95E-11 | 3.15E-10 |
| USP25   | 1.033217176  | 8.04E-11 | 3.18E-10 |
| SAP18   | 1.050514307  | 8.04E-11 | 3.18E-10 |
| GPR17   | 1.107712032  | 8.24E-11 | 3.25E-10 |
| FGF4    | 1.375749731  | 8.34E-11 | 3.28E-10 |
| T       | 1.401100783  | 8.45E-11 | 3.32E-10 |
| ZNF638  | 1.074833922  | 8.46E-11 | 3.32E-10 |
| PCLO    | 1.77537288   | 8.64E-11 | 3.38E-10 |
| GALNT3  | 1.653231687  | 8.65E-11 | 3.38E-10 |
| SYT11   | 1.180397862  | 8.72E-11 | 3.40E-10 |
| SNX4    | 1.217657439  | 8.85E-11 | 3.45E-10 |
| IRAK4   | 1.263645668  | 8.87E-11 | 3.46E-10 |
| MED17   | 1.091813415  | 9.34E-11 | 3.63E-10 |
| PTGDR2  | 1.594948269  | 9.43E-11 | 3.65E-10 |
| KLK15   | 1.438808956  | 9.69E-11 | 3.75E-10 |
| CCDC134 | 1.183799968  | 9.76E-11 | 3.77E-10 |
| CCNT2   | 1.322356081  | 9.79E-11 | 3.78E-10 |
| RAB22A  | 1.191087344  | 1.00E-10 | 3.85E-10 |
| SAMD4B  | 1.462965042  | 1.01E-10 | 3.88E-10 |
| VGf     | 1.099194724  | 1.06E-10 | 4.04E-10 |
| GRPR    | 1.428163733  | 1.06E-10 | 4.05E-10 |
| IL1R2   | 1.314459739  | 1.07E-10 | 4.06E-10 |
| PNN     | 1.25817252   | 1.09E-10 | 4.13E-10 |
| CSDC2   | 1.319933249  | 1.09E-10 | 4.15E-10 |
| MOBP    | 1.398000828  | 1.10E-10 | 4.17E-10 |
| MED1    | 1.375524977  | 1.11E-10 | 4.21E-10 |
| ASB7    | 1.272281304  | 1.14E-10 | 4.31E-10 |
| SLC16A7 | 1.194381153  | 1.19E-10 | 4.46E-10 |

|          |              |          |          |
|----------|--------------|----------|----------|
| CRK      | 1.094552534  | 1.20E-10 | 4.50E-10 |
| HUS1     | 1.044577667  | 1.23E-10 | 4.60E-10 |
| ACBD3    | 1.179097152  | 1.26E-10 | 4.68E-10 |
| ALDH5A1  | 1.273600781  | 1.29E-10 | 4.79E-10 |
| BCL7A    | 1.218228848  | 1.29E-10 | 4.80E-10 |
| ALOXE3   | 1.032245829  | 1.30E-10 | 4.85E-10 |
| KLHL22   | 1.130722856  | 1.32E-10 | 4.90E-10 |
| PYY      | 1.102945967  | 1.33E-10 | 4.95E-10 |
| CD80     | 1.338035562  | 1.36E-10 | 5.02E-10 |
| C2orf72  | 1.113248914  | 1.38E-10 | 5.10E-10 |
| LMOD1    | 1.420595208  | 1.41E-10 | 5.18E-10 |
| HLA-DQB1 | -1.033165337 | 1.44E-10 | 5.30E-10 |
| CHMP2B   | 1.196523182  | 1.46E-10 | 5.37E-10 |
| AIDA     | 1.219218499  | 1.55E-10 | 5.64E-10 |
| NR1D2    | 1.03761556   | 1.55E-10 | 5.66E-10 |
| PRDX2    | 1.087632183  | 1.62E-10 | 5.90E-10 |
| NDUFA3   | -1.070854312 | 1.65E-10 | 6.00E-10 |
| EHD2     | 1.139755817  | 1.66E-10 | 6.03E-10 |
| AHSG     | 1.362963497  | 1.67E-10 | 6.04E-10 |
| ARL4D    | 1.15375831   | 1.67E-10 | 6.05E-10 |
| ANKRD53  | 1.3593523    | 1.70E-10 | 6.13E-10 |
| SLC14A1  | 1.277387577  | 1.70E-10 | 6.14E-10 |
| CYP11B1  | 1.440557871  | 1.70E-10 | 6.16E-10 |
| PBLD     | 1.01613183   | 1.74E-10 | 6.28E-10 |
| SPTBN4   | 1.160228624  | 1.78E-10 | 6.42E-10 |
| SORBS1   | 1.195154826  | 1.82E-10 | 6.52E-10 |
| RAB14    | 1.401471389  | 1.83E-10 | 6.55E-10 |
| CTAGE1   | 1.223519857  | 1.84E-10 | 6.59E-10 |
| NAP1L4   | 1.136075814  | 1.86E-10 | 6.64E-10 |
| FOXJ2    | 1.299546686  | 1.86E-10 | 6.65E-10 |
| LATS1    | 1.014919763  | 1.90E-10 | 6.76E-10 |
| C11orf16 | 1.166343582  | 1.96E-10 | 6.97E-10 |
| WNT4     | 1.126130918  | 2.06E-10 | 7.27E-10 |
| SIPA1L3  | 1.254458508  | 2.14E-10 | 7.50E-10 |
| EP400    | 1.094354463  | 2.26E-10 | 7.86E-10 |
| TMOD2    | 1.125311711  | 2.29E-10 | 7.97E-10 |
| ARHGEF9  | 1.279791503  | 2.34E-10 | 8.14E-10 |
| METTL9   | 1.5446314    | 2.36E-10 | 8.22E-10 |
| LMAN1    | 1.152301964  | 2.39E-10 | 8.29E-10 |
| NKX2-5   | -1.24162692  | 2.50E-10 | 8.64E-10 |
| SLC22A17 | 1.063927277  | 2.60E-10 | 8.92E-10 |
| PER3     | 1.335591905  | 2.62E-10 | 8.98E-10 |
| PHF8     | 1.146091559  | 2.63E-10 | 9.01E-10 |
| CACNA2D3 | 1.187677684  | 2.73E-10 | 9.31E-10 |

|          |              |          |          |
|----------|--------------|----------|----------|
| CADM3    | 1.015875936  | 2.79E-10 | 9.49E-10 |
| VIL1     | 1.003853203  | 2.83E-10 | 9.61E-10 |
| DUSP7    | 1.00766684   | 2.96E-10 | 9.98E-10 |
| NEUROG1  | 1.130644844  | 3.07E-10 | 1.03E-09 |
| EFEMP2   | 1.181401201  | 3.10E-10 | 1.04E-09 |
| PGGT1B   | 1.169018731  | 3.15E-10 | 1.05E-09 |
| GPR3     | 1.019754262  | 3.18E-10 | 1.06E-09 |
| MYBPC2   | 1.576418522  | 3.24E-10 | 1.08E-09 |
| CST2     | 1.40779584   | 3.25E-10 | 1.08E-09 |
| ANKRD12  | 1.081025095  | 3.32E-10 | 1.10E-09 |
| NEFM     | 1.035217081  | 3.37E-10 | 1.12E-09 |
| FGD1     | 1.485587717  | 3.45E-10 | 1.14E-09 |
| MYL4     | 1.283371129  | 3.48E-10 | 1.15E-09 |
| BZRAP1   | 1.274526339  | 3.51E-10 | 1.16E-09 |
| CRABP1   | 1.440754664  | 3.52E-10 | 1.16E-09 |
| POLR3F   | 1.031166876  | 3.55E-10 | 1.17E-09 |
| DDX52    | 1.266958579  | 3.56E-10 | 1.17E-09 |
| ACPP     | 1.111607109  | 3.58E-10 | 1.18E-09 |
| CPEB1    | 1.214863929  | 3.67E-10 | 1.20E-09 |
| PDE4D    | 1.157709313  | 3.74E-10 | 1.22E-09 |
| TNKS     | 1.011117975  | 3.75E-10 | 1.23E-09 |
| FOLR3    | 1.052092528  | 3.80E-10 | 1.24E-09 |
| MGST3    | -1.239121321 | 3.81E-10 | 1.24E-09 |
| NTRK2    | 1.206500453  | 3.90E-10 | 1.27E-09 |
| CDCA4    | 1.192881374  | 3.95E-10 | 1.28E-09 |
| PPAT     | 1.144220926  | 4.06E-10 | 1.32E-09 |
| GLP2R    | 1.026962687  | 4.06E-10 | 1.32E-09 |
| EIF5A2   | 1.003306462  | 4.08E-10 | 1.32E-09 |
| PBX1     | 1.061803288  | 4.11E-10 | 1.33E-09 |
| INPP5A   | 1.080105367  | 4.20E-10 | 1.36E-09 |
| IFNA4    | 1.085793115  | 4.25E-10 | 1.37E-09 |
| TMEM135  | 1.265776809  | 4.28E-10 | 1.38E-09 |
| TMCC2    | 1.147863466  | 4.42E-10 | 1.41E-09 |
| PIGA     | 1.061384737  | 4.88E-10 | 1.54E-09 |
| KIAA0319 | 1.413878448  | 5.07E-10 | 1.60E-09 |
| LZTFL1   | 1.0012141    | 5.12E-10 | 1.61E-09 |
| GAST     | 1.152537374  | 5.12E-10 | 1.62E-09 |
| HP       | -1.343053809 | 5.20E-10 | 1.64E-09 |
| RSAD2    | 1.128472012  | 5.29E-10 | 1.66E-09 |
| USP34    | 1.056421351  | 5.47E-10 | 1.71E-09 |
| GP1BA    | 1.389186342  | 5.73E-10 | 1.79E-09 |
| MCTP2    | 1.28131513   | 5.79E-10 | 1.80E-09 |
| HOXB13   | 1.266375189  | 5.90E-10 | 1.83E-09 |
| SCAMP4   | 1.022451073  | 5.94E-10 | 1.84E-09 |

|          |              |          |          |
|----------|--------------|----------|----------|
| TPSG1    | -1.200736778 | 6.06E-10 | 1.88E-09 |
| RPL41    | -1.257128861 | 6.09E-10 | 1.88E-09 |
| RPL19    | -1.244305627 | 6.39E-10 | 1.97E-09 |
| ZNF292   | 1.109182758  | 6.51E-10 | 2.01E-09 |
| COX7A2   | -1.017398659 | 6.53E-10 | 2.01E-09 |
| HLA-DQA1 | -1.176128659 | 6.70E-10 | 2.06E-09 |
| RPLP1    | -1.032933153 | 6.78E-10 | 2.08E-09 |
| KLHL7    | 1.137165132  | 6.86E-10 | 2.10E-09 |
| PRICKLE3 | 1.071404551  | 6.99E-10 | 2.14E-09 |
| GATA1    | 1.433009102  | 7.12E-10 | 2.17E-09 |
| KIF3C    | 1.419959618  | 7.25E-10 | 2.21E-09 |
| COL6A3   | 1.129852192  | 7.37E-10 | 2.24E-09 |
| GNG4     | 1.19309948   | 7.63E-10 | 2.31E-09 |
| SNX16    | 1.492641327  | 7.65E-10 | 2.31E-09 |
| DLG3     | 1.077672222  | 8.11E-10 | 2.44E-09 |
| TNFRSF4  | 1.033491208  | 8.29E-10 | 2.49E-09 |
| VAMP8    | -1.225582572 | 8.36E-10 | 2.51E-09 |
| DHTKD1   | 1.036437489  | 8.64E-10 | 2.58E-09 |
| TRAM2    | 1.222855657  | 8.87E-10 | 2.64E-09 |
| MBOAT2   | 1.523916641  | 9.02E-10 | 2.69E-09 |
| TTC22    | 1.349761658  | 9.29E-10 | 2.75E-09 |
| SLC25A5  | -1.009060343 | 9.43E-10 | 2.79E-09 |
| PXDN     | 1.003069321  | 9.57E-10 | 2.83E-09 |
| TRIM2    | 1.188652219  | 9.75E-10 | 2.88E-09 |
| TRIM33   | 1.119042178  | 9.88E-10 | 2.91E-09 |
| ARTN     | 1.03267489   | 9.97E-10 | 2.93E-09 |
| C6orf25  | 1.134447083  | 1.05E-09 | 3.06E-09 |
| TLK1     | 1.009488521  | 1.19E-09 | 3.46E-09 |
| RNF24    | 1.262686609  | 1.42E-09 | 4.04E-09 |
| RPL11    | -1.219681161 | 1.46E-09 | 4.13E-09 |
| ECE1     | 1.000191001  | 1.58E-09 | 4.47E-09 |
| HSPB6    | 1.107435111  | 1.71E-09 | 4.82E-09 |
| KDM5A    | 1.084840785  | 1.72E-09 | 4.84E-09 |
| STMN2    | 1.140718157  | 1.73E-09 | 4.85E-09 |
| MADCAM1  | 1.007141539  | 1.76E-09 | 4.94E-09 |
| GJB3     | 1.166798168  | 1.77E-09 | 4.96E-09 |
| SENP6    | 1.034499486  | 1.80E-09 | 5.03E-09 |
| OLFM4    | 1.291290952  | 1.95E-09 | 5.40E-09 |
| ACTC1    | 1.070483308  | 2.07E-09 | 5.72E-09 |
| FRMD4B   | 1.063369179  | 2.84E-09 | 7.65E-09 |
| MAP3K9   | 1.039260676  | 2.90E-09 | 7.80E-09 |
| SPTLC2   | 1.298713657  | 3.27E-09 | 8.69E-09 |
| IRF2     | 1.013613522  | 3.49E-09 | 9.22E-09 |
| PHTF1    | 1.06348797   | 3.49E-09 | 9.23E-09 |

|          |              |          |          |
|----------|--------------|----------|----------|
| CRYBB3   | 1.080897479  | 3.56E-09 | 9.40E-09 |
| C8orf4   | 1.016745034  | 3.77E-09 | 9.90E-09 |
| BCL10    | 1.193699325  | 3.82E-09 | 1.00E-08 |
| MPL      | 1.18858773   | 4.11E-09 | 1.07E-08 |
| BCAM     | 1.038412347  | 4.13E-09 | 1.08E-08 |
| PDE5A    | 1.00349972   | 4.20E-09 | 1.09E-08 |
| HRH3     | 1.044003859  | 4.26E-09 | 1.11E-08 |
| HLA-DQB2 | -1.107048361 | 4.44E-09 | 1.15E-08 |
| GRAMD1C  | 1.079680188  | 4.74E-09 | 1.22E-08 |
| ZFYVE9   | 1.123939227  | 5.37E-09 | 1.36E-08 |
| BAGE     | 1.231988445  | 6.45E-09 | 1.61E-08 |
| SSTR2    | 1.28588127   | 6.89E-09 | 1.70E-08 |
| NKX2-8   | 1.11561984   | 8.43E-09 | 2.06E-08 |
| RPL32    | -1.047559196 | 8.66E-09 | 2.11E-08 |
| RPS4X    | -1.009338509 | 9.02E-09 | 2.19E-08 |
| SIX3     | 1.051091361  | 9.32E-09 | 2.26E-08 |
| PROP1    | 1.120731382  | 9.98E-09 | 2.40E-08 |
| RPL23A   | -1.053972749 | 1.15E-08 | 2.74E-08 |
| STK38L   | 1.015233923  | 1.23E-08 | 2.90E-08 |
| PTGS2    | 1.152049872  | 1.27E-08 | 3.01E-08 |
| UPK3B    | 1.139213643  | 1.47E-08 | 3.44E-08 |
| MAK      | 1.024987947  | 1.67E-08 | 3.85E-08 |
| RPL27    | -1.192552165 | 1.74E-08 | 4.00E-08 |
| CPLX2    | 1.062829348  | 1.91E-08 | 4.36E-08 |
| RPS14    | -1.034803462 | 1.91E-08 | 4.37E-08 |
| CD52     | -1.190696792 | 1.92E-08 | 4.39E-08 |
| SIK3     | 1.039294621  | 2.40E-08 | 5.39E-08 |
| SLC39A6  | 1.05512665   | 2.76E-08 | 6.15E-08 |
| FAM198B  | 1.028289209  | 2.87E-08 | 6.37E-08 |
| USP12    | 1.024898801  | 2.91E-08 | 6.44E-08 |
| RRAD     | 1.0451362    | 3.18E-08 | 7.01E-08 |
| ADAM28   | 1.023393705  | 3.26E-08 | 7.18E-08 |
| BAALC    | 1.007132478  | 3.53E-08 | 7.73E-08 |
| F5       | 1.093471993  | 3.73E-08 | 8.14E-08 |
| ITGB3    | 1.240047215  | 3.77E-08 | 8.22E-08 |
| RPS10    | -1.232847393 | 3.96E-08 | 8.59E-08 |
| PRSS23   | 1.019053198  | 4.45E-08 | 9.58E-08 |
| ATP1B2   | 1.106283728  | 5.39E-08 | 1.14E-07 |
| KRT14    | 1.292763576  | 5.62E-08 | 1.19E-07 |
| KRT13    | 1.027637649  | 5.95E-08 | 1.25E-07 |
| RPL35A   | -1.062971801 | 6.29E-08 | 1.32E-07 |
| NOVA2    | 1.076109888  | 1.00E-07 | 2.04E-07 |
| YTHDC1   | 1.053827494  | 1.36E-07 | 2.71E-07 |
| RPS21    | -1.104134994 | 1.46E-07 | 2.91E-07 |



|          |             |          |          |
|----------|-------------|----------|----------|
| STEAP4   | 1.06561068  | 3.42E-07 | 6.48E-07 |
| SERPINB2 | 1.027916658 | 6.10E-06 | 9.96E-06 |

---
