# Supplementary material for: Identification of the Molecular Subgroups in Idiopathic Pulmonary Fibrosis by Gene Expression Profiles
Source: Hindawi journal article supplement (doi:10.1155/2021/7922594), 2021-10-04
Supplement: f1 [file 7922594.f1.zip]

supplementary table 2

Upregulating and downregulating DEGs

| Upregulating DEGs | Downregulating DEGs |
|-------------------|---------------------|
| LRRN3             | PLA2G7              |
| EMG1              | VCAN                |
| TMEM204           | SORL1               |
| RPL23AP32         | GSN                 |
| FAM153A           | LHFPL2              |
| ANKRD2            | SPP1                |
| KRTAP5-8          | CTSK                |
| POU3F3            | TGFBI               |
| GFAP              | AQP9                |
| APOL3             | LITAF               |
| BDH2              | EMP1                |
| BAG3              | LYN                 |
| BACH2             | ICAM3               |
| MSX1              | S100P               |
| MS4A1             | ITGAX               |
| ZNF331            | CD97                |
| GDNF              | CXCR4               |
| KLRF1             | PSAP                |
| PRX               | VASP                |
| CD79B             | VIM                 |
| SOX17             | LIPA                |
| TCF7              | ARPC5               |
| CTSW              | SPRR1A              |
| C19orf53          | TNFAIP2             |
| MST1              | GCA                 |
| GPT               | SERPINA1            |
| MRPL40            | SRGN                |
| CLDN5             | LY96                |
| HPGD              | IL1RN               |
| MTG1              | GRN                 |
| KLHDC2            | TCIRG1              |
| CLIC3             | PRCP                |
| S1PR1             | C1orf54             |
| ZNF862            | LGALS1              |
| ATP5S             | LGALS3              |
| HPCA              | ATP6AP2             |
| CXCR5             | PLBD1               |
| ALG13             | HEBP2               |
| PTCD2             | FBP1                |

|         |          |
|---------|----------|
| RIC3    | CTSA     |
| ZNF492  | CD163    |
| USP53   | RAC2     |
| CHRNA2  | S100A11  |
| NDUFA4  | QSOX1    |
| CNR1    | MSN      |
| PHACTR4 | CAPG     |
| CACNB1  | ABR      |
| NKX3-1  | PGD      |
| PCDH9   | ACP5     |
| IRX5    | GLA      |
| SMA4    | CTSZ     |
| ABHD10  | EMILIN2  |
| CNTNAP2 | CTSD     |
| TSPYL2  | HIST1H3C |
| FRMD4A  | ARHGDIB  |
| RNF144A | H3F3A    |
| SPTBN1  | ZFP36    |
| TCL1B   | MS4A4A   |
| KLRB1   | DAZAP2   |
| DCAF4   | ALOX5    |
| DGKE    | ATP6V0C  |
| ZNF91   | LCP1     |
| BBS1    | STAT6    |
| IPO9    | COTL1    |
| CACNA1E | KRT81    |
| ZNF24   | MARCO    |
| UTRN    | FCGR1B   |
| SOX18   | VASH1    |
| OVGP1   | NPC2     |
| TOE1    | TYMP     |
| PUS7L   | SNX2     |
| FAM111A | APOE     |
| SFXN1   | SGK1     |
| BDH1    | ACTB     |
| SCAI    | HSP90B1  |
| ADRA1D  | CSF1R    |
| MRPS27  | S100A8   |
| LY9     | CEBPB    |
| PIP5K1B | TUBB6    |
| LMF1    | FCER1G   |
| C1orf21 | SH3BGRL3 |
| MYCN    | LMNA     |
| FOXE1   | HLA-B    |

|          |          |
|----------|----------|
| ZNF358   | S100A10  |
| OFD1     | CEBPD    |
| GAS2     | S100A4   |
| ASF1A    | CYP2W1   |
| GATAD1   | AIF1     |
| GPR12    | CDC42    |
| TMEM97   | SNX3     |
| TAF1D    | ATP6AP1  |
| KRTAP5-9 | GMFG     |
| MMP15    | HCLS1    |
| SOCS7    | ACADVL   |
| IRX4     | CHMP2A   |
| STAT3    | HMOX1    |
| PAIP2B   | HSP90AA1 |
| GPR20    | IFIT1    |
| PDZD7    | ISG15    |
| VPRBP    | PPT1     |
| GPR37    | MOGS     |
| WWOX     | TREM1    |
| PALM     | CD14     |
| KRIT1    | S100A6   |
| GPX7     | EIF1     |
| KIR2DL2  | VCP      |
| C21orf91 | FGR      |
| GOLGA8A  | C1QB     |
| PYHIN1   | TUBB2A   |
| DUSP2    | SLA      |
| FUT5     | BAG1     |
| PASK     | CRIP1    |
| GPR126   | CYB5R3   |
| CAMLG    | ALDH2    |
| ZNF506   | GAA      |
| VPS39    | SIDT2    |
| ZNF43    | ATP1B3   |
| NELL2    | TMEM59   |
| CRTAP    | PSMB10   |
| TMEM194A | TSPO     |
| GZMA     | B2M      |
| UBOX5    | PECAM1   |
| DNPEP    | GPX1     |
| ULK4     | RAP1B    |
| CNPY4    | UBB      |
| FHIT     | ATP1B1   |
| QRSL1    | OAZ1     |

|           |          |
|-----------|----------|
| MAPKAPK5  | ARPC2    |
| NPR2      | TKT      |
| POMT2     | LAMP1    |
| ATP8B2    | GNAI2    |
| N4BP3     | ATP5E    |
| ZNF507    | ANXA1    |
| INTS6     | GNG5     |
| EFNB3     | ANXA2    |
| ARG1      | RETN     |
| KRR1      | COX6B1   |
| TCF7L2    | PLA2G15  |
| BCR       | CLIC1    |
| TBC1D19   | TMEM176B |
| ACVR2B    | SEPT9    |
| GAMT      | TUBA1B   |
| LGR4      | RGS10    |
| FLJ11710  | PTMA     |
| MAB21L2   | COX8A    |
| ZNF510    | CCDC9    |
| FEM1C     | OGFR     |
| CA4       | HLA-DPB1 |
| KCNK7     | CYP27A1  |
| E2F5      | RPS27L   |
| OSGEPL1   | PPBP     |
| ZNF609    | RPS24    |
| LOC202181 | HSPB1    |
| FAM168A   | RPLP2    |
| INPP4B    | HLA-DMA  |
| RAD9A     | MAP4     |
| HBS1L     | TXNIP    |
| OGDH      | ADAMTS7  |
| ARHGAP24  | GM2A     |
| TRIM66    | HLA-DQB1 |
| NBPF1     | NDUFA3   |
| FLJ10038  | NKX2-5   |
| ZNF430    | MGST3    |
| MBTPS2    | HP       |
| INADL     | TPSG1    |
| CTRL      | RPL41    |
| TNIK      | RPL19    |
| DTX3      | COX7A2   |
| ZAP70     | HLA-DQA1 |
| PNPLA4    | RPLP1    |
| JAM3      | VAMP8    |

|          |          |
|----------|----------|
| GEMIN8   | SLC25A5  |
| TCEB3    | RPL11    |
| TRIB2    | HLA-DQB2 |
| MALT1    | RPL32    |
| ZNF665   | RPS4X    |
| RNF41    | RPL23A   |
| SCN3B    | RPL27    |
| ADAMTS5  | RPS14    |
| PFKM     | CD52     |
| RUFY3    | RPS10    |
| PPP2CA   | RPL35A   |
| CR2      | RPS21    |
| DDX50    |          |
| CCT5     |          |
| SEMA3B   |          |
| GH2      |          |
| IFT52    |          |
| ANGPT1   |          |
| ADCY9    |          |
| PPP1R2   |          |
| DLD      |          |
| ST8SIA2  |          |
| SLC7A6   |          |
| TTC9     |          |
| METAP1   |          |
| KIR2DS4  |          |
| ZNF132   |          |
| CLDN11   |          |
| NT5E     |          |
| SAMD9    |          |
| NDRG3    |          |
| ERCC2    |          |
| HLTF     |          |
| AVIL     |          |
| NFATC4   |          |
| BCAS4    |          |
| LEF1     |          |
| EPM2A    |          |
| DYNC1LI2 |          |
| CASP8    |          |
| MSH3     |          |
| OTUD3    |          |
| FOXRED2  |          |
| SLC17A4  |          |

PLG  
MRS2  
ZNHIT6  
IFT57  
ZNF79  
VAV2  
HHLA3  
IL18R1  
ARHGEF12  
RALGPS2  
NR4A1  
CPN2  
ELF5  
MLEC  
HNF1B  
ZNF140  
SLC4A5  
ABCC4  
LIMD2  
SUPT3H  
PRKRIR  
DHDDS  
RASL12  
TBC1D8  
KIF1A  
POLH  
SULT1B1  
ZNF473  
FRS3  
VPREB1  
NPBWR2  
ENDOD1  
SYCE1L  
WDR46  
MFGE8  
TIGD6  
SNIP1  
CA5A  
FGF9  
EPM2AIP1  
ENO2  
SAMD14  
ZNF706  
USP7

EHBP1  
C10orf2  
PPP2R5A  
GIN1  
SMURF2  
CHGA  
FUT2  
SHC3  
RGS6  
KIAA0485  
HEXIM1  
ERI3  
ZNF468  
DTNB  
AXIN1  
LOC100130331  
EFHC1  
GHRHR  
ZC3H13  
C16orf3  
PLCL1  
TOB2  
PLCH2  
HEMK1  
TM2D3  
CYP2E1  
TMEM8B  
KCNIP2  
SCNN1B  
RPS6KB1  
KIRREL  
HTR3A  
SEC61A2  
TJP1  
DLX2  
CAPRIN1  
AGBL5  
GRAMD1B  
MYCT1  
COX15  
PF4V1  
BIRC2  
SOX21  
HIST3H2A

UBASH3A  
ARMCX3  
XPO4  
ESPN  
PRDM11  
EML3  
FAM69A  
LY6G5C  
CSNK1A1  
EPPK1  
C6orf120  
UBE2O  
CASKIN2  
CAMTA1  
AP4M1  
FBXO17  
TPR  
KIR3DL1  
STRADA  
CYP3A5  
MTHFSD  
RBM15B  
ZNF222  
SMC5  
XPNPEP2  
STK17A  
EID1  
FAM172A  
ANKFY1  
INPP1  
MICAL3  
MASP2  
DRD2  
IL21R  
USP25  
SAP18  
GPR17  
FGF4  
T  
ZNF638  
PCLO  
GALNT3  
SYT11  
SNX4



IRAK4  
MED17  
PTGDR2  
KLK15  
CCDC134  
CCNT2  
RAB22A  
SAMD4B  
VGF  
GRPR  
IL1R2  
PNN  
CSDC2  
MOBP  
MED1  
ASB7  
SLC16A7  
CRK  
HUS1  
ACBD3  
ALDH5A1  
BCL7A  
ALOXE3  
KLHL22  
PYY  
CD80  
C2orf72  
LMOD1  
CHMP2B  
AIDA  
NR1D2  
PRDX2  
EHD2  
AHSG  
ARL4D  
ANKRD53  
SLC14A1  
CYP11B1  
PBLD  
SPTBN4  
SORBS1  
RAB14  
CTAGE1  
NAP1L4

FOXJ2  
LATS1  
C11orf16  
WNT4  
SIPA1L3  
EP400  
TMOD2  
ARHGEF9  
METTL9  
LMAN1  
SLC22A17  
PER3  
PHF8  
CACNA2D3  
CADM3  
VIL1  
DUSP7  
NEUROG1  
EFEMP2  
PGGT1B  
GPR3  
MYBPC2  
CST2  
ANKRD12  
NEFM  
FGD1  
MYL4  
BZRAP1  
CRABP1  
POLR3F  
DDX52  
ACPP  
CPEB1  
PDE4D  
TNKS  
FOLR3  
NTRK2  
CDCA4  
PPAT  
GLP2R  
EIF5A2  
PBX1  
INPP5A  
IFNA4

TMEM135  
TMCC2  
PIGA  
KIAA0319  
LZTFL1  
GAST  
RSAD2  
USP34  
GP1BA  
MCTP2  
HOXB13  
SCAMP4  
ZNF292  
KLHL7  
PRICKLE3  
GATA1  
KIF3C  
COL6A3  
GNG4  
SNX16  
DLG3  
TNFRSF4  
DHTKD1  
TRAM2  
MBOAT2  
TTC22  
PXDN  
TRIM2  
TRIM33  
ARTN  
C6orf25  
TLK1  
RNF24  
ECE1  
HSPB6  
KDM5A  
STMN2  
MADCAM1  
GJB3  
SENPA6  
OLFM4  
ACTC1  
FRMD4B  
MAP3K9

SPTLC2  
IRF2  
PHTF1  
CRYBB3  
C8orf4  
BCL10  
MPL  
BCAM  
PDE5A  
HRH3  
GRAMD1C  
ZFYVE9  
BAGE  
SSTR2  
NKX2-8  
SIX3  
PROP1  
STK38L  
PTGS2  
UPK3B  
MAK  
CPLX2  
SIK3  
SLC39A6  
FAM198B  
USP12  
RRAD  
ADAM28  
BAALC  
F5  
ITGB3  
PRSS23  
ATP1B2  
KRT14  
KRT13  
NOVA2  
YTHDC1  
STEAP4  
SERPINB2

---
