# Supplementary material for: Identification of the Molecular Subgroups in Idiopathic Pulmonary Fibrosis by Gene Expression Profiles
Source: Hindawi journal article supplement (doi:10.1155/2021/7922594), 2021-10-04
Supplement: f1 [file 7922594.f1.zip]

supplementary table 3

## Enrichment analysis of KEGG pathway (part)

| Cluster     | Description                                   | pvalue                   | geneID                                                                                                                                                                                                                                                                                                                                                                            |
|-------------|-----------------------------------------------|--------------------------|-----------------------------------------------------------------------------------------------------------------------------------------------------------------------------------------------------------------------------------------------------------------------------------------------------------------------------------------------------------------------------------|
| blue        | Autophagy-animal                              | 1.218301316<br>4782E-07  | AKT3/ATG12/ATG2B/ATG3/ATG5/ATG9<br>A/BCL2L1/BECN1/BNIP3/CAMKK2/CT<br>SD/EIF2S1/HIF1A/ITPR1/KRAS/LAMP2<br>/MAP2K2/MAP3K7/MAPK3/NRAS/PIK3<br>C3/PIK3CA/PIK3R1/PPP2CA/PPP2CB/P<br>RKAA1/PRKACB/PTEN/RAB1A/RB1CC<br>1/RHEB/RPS6KB1/RRAGD/RRAS/SH3G<br>LB1/TANK/TBK1/TSC2/ULK2                                                                                                         |
| greenyellow | Oxidative<br>phosphorylation                  | 1.205751363<br>03187E-11 | COX7A2/NDUFA4/NDUFA8/NDUFAB1/<br>NDUFB1/NDUFB2/NDUFB4/NDUFB8/N<br>DUFC1/NDUFS3/NDUFS6/UQCRCF1/U<br>QCRQ                                                                                                                                                                                                                                                                           |
| grey        | ECM-receptor<br>interaction                   | 0.000286418<br>592072073 | CD44/COL4A1/COL6A1/COL6A3/GP1B<br>A/ITGA2B/ITGB3/LAMA1/LAMA3/LA<br>MA4/LAMA5/SDC4/THBS1                                                                                                                                                                                                                                                                                           |
| magenta     | Ribosome                                      | 1.974126967<br>75556E-77 | FAU/RPL10A/RPL10L/RPL11/RPL12/RP<br>L14/RPL15/RPL19/RPL22/RPL23A/RPL2<br>4/RPL27/RPL27A/RPL29/RPL3/RPL30/R<br>PL31/RPL32/RPL34/RPL35/RPL35A/RP<br>L36AL/RPL37/RPL37A/RPL38/RPL39/R<br>PL41/RPL6/RPL7/RPL8/RPL9/RPLP0/RP<br>S10/RPS11/RPS12/RPS14/RPS15A/RPS1<br>6/RPS17/RPS18/RPS19/RPS21/RPS23/RP<br>S24/RPS25/RPS27/RPS27A/RPS27L/RPS<br>28/RPS29/RPS3/RPS4X/RPS6/RPS7/RPS<br>8 |
| pink        | Neuroactive<br>ligand-receptor<br>interaction | 1.789038094<br>80975E-14 | ADRA1D/ADRB3/CHRNA4/CNR1/COR<br>T/CRHR1/CRHR2/CSH1/DRD2/DRD4/G<br>ABRB2/GABRG2/GALR3/GH2/GHRHR/<br>GHSR/GIPR/GLP2R/GNRH2/GRID2/GRI<br>K5/GRIN1/GRIN2D/GRPR/HCRT/HCRT<br>R1/HRH3/HTR1B/KISS1/LTB4R2/NPBW<br>R2/OPRD1/OPRL1/OXT/OXTR/P2RX2/P<br>2RX3/PPY/PRLH/PRSS2/PRSS3/PYY/SS<br>TR2/SSTR3/TAAR2/TAAR5/TACR2/TBX<br>A2R/TSHB                                                     |
| pink        | Calcium signaling<br>pathway                  | 0.001235779<br>0149814   | ADRA1D/ADRB3/CACNA1B/CACNA1<br>C/CACNA1E/CACNA1H/FGF3/GRIN1/G<br>RIN2D/GRPR/HRC/LTB4R2/MST1/NOS                                                                                                                                                                                                                                                                                   |

|     |                                     |                          |                                                     |
|-----|-------------------------------------|--------------------------|-----------------------------------------------------|
|     |                                     |                          | 1/NOS3/NTRK2/OXTR/P2RX2/P2RX3/T<br>ACR2/TBXA2R      |
| tan | Th1 and Th2 cell<br>differentiation | 2.170644375<br>65144E-07 | CD247/CD3D/HLA-DMB/IL2RB/JAK3/R<br>UNX3/STAT4/ZAP70 |

---
