# Supplementary material for: Identification of the Molecular Subgroups in Idiopathic Pulmonary Fibrosis by Gene Expression Profiles
Source: Comput Math Methods Med. 2021 Oct 4;2021:7922594. doi: 10.1155/2021/7922594 (PMC8505108; doi:10.1155/2021/7922594)
Supplement: Supplementary Materials — There are three supplementary materials in this article. [file 7922594.f1.zip]

Archive with 3 entries (3 files):
- supplementary table 1.pdf
- supplementary table 2.pdf
- supplementary table 3.pdf
